# Supplementary material for: Calcium dependence of neurotransmitter release at a high fidelity synapse
Source: eLife. 2021 Oct 6;10:e70408. doi: 10.7554/eLife.70408 (PMC8494478; doi:10.7554/eLife.70408)
Supplement: Figure 1—source data 1. [file elife-70408-fig1-data1.xlsx]

## Sheet: Figure 1
Figure		1A			1D			1D			1D			1D			1D
Measurement		free [Ca2+] in presyn. Soln.			EPSC amplitude			decay tau w.			rise time			AP amplitude			AP half duration
Unit		nM			pA			ms			μs			mV			μs
resting [Ca2+]		low	high		low	high		low	high		low	high		low	high		low	high
		33	203		35.06	111.1		2.78	5.59		135	200		96	56		163	111
		33	191		73.98	209		4.84	3.11		242	140		88	87		214	105
		25	170		34.38	37.67		4.6	4.3		315	124		114	92		110	166
		21	168		53.71	29.5		1.99	0.94		291	283		110	101		116	105
					16.58	63.35		3	0.74		119	132		87	78		167	115
					5.23	231.57		2.45	2.46		245	198		105	71		134	225
					63.61	89		2.04	3.33		200	268		73	95		163	150
					31.33	172.47		1.56	2.91		170	195		66	48		154	168
