# Supplementary material for: Calcium dependence of neurotransmitter release at a high fidelity synapse
Source: eLife. 2021 Oct 6;10:e70408. doi: 10.7554/eLife.70408 (PMC8494478; doi:10.7554/eLife.70408)
Supplement: Figure 2—source data 1. [file elife-70408-fig2-data1.xlsx]

## Sheet: Figure 2
Figure		2F			2F			2F			2F			2G			2G
Measurement		release rate 5kHz Cm vs. [Ca2+]			release rate 10kHz Cm vs. [Ca2+]			release rate 5kHz (limit) Cm vs. [Ca2+]			release rate 10kHz (limit) Cm vs. [Ca2+]			delay 5kHz vs. [Ca2+]			delay 10kHz vs. [Ca2+]
		[Ca2+]	release rate		[Ca2+]	release rate		[Ca2+]	release rate		[Ca2+]	release rate		[Ca2+]	delay		[Ca2+]	delay
Unit		μM	ms-1		μM	ms-1		μM	ms-1		μM	ms-1		μM	ms		μM	ms
		9.71	0.26		19.62	4.82		11.08	10.98		19.14	41.52		9.71	0.39		19.62	0.15
		6.46	0.58		27.16	4.01		16.05	12.83		31.76	21.83		6.46	0.4		19.14	0.28
		4.92	0.73		40.1	6.6		62.82	6.15		45.11	27.2		4.92	0.34		27.16	0.14
		8.68	0.86		45.11	5.41		34.33	9.23		36.25	14.71		8.68	0.27		40.1	0.26
		14.48	2.29		34.33	7.09		27.88	7.22		37.1	22.02		14.48	0.3		45.11	0.25
		19.76	1.41		40.1	6.99		26.81	6.92		21.33	12.8		11.08	0.3		34.33	0.25
		11.66	2.61		23.15	2.17		19.43	26.77					19.76	0.23		31.76	0.39
		6.6	1.07		23.15	4.68		16.37	5.33					11.66	0.3		40.1	0.15
		18.03	2.64		27.16	5.09								6.6	0.3		23.15	0.19
		7.16	0.55											18.03	0.05		23.15	0.31
		5.98	0.32											7.16	0.59		27.16	0.2
		3.88	0.74											5.98	2		45.11	0.09
		8.68	0.71											3.88	0.32		36.25	0.15
		3.22	0.67											8.68	0.26		37.1	0.14
		7.41	0.19											3.22	0.54		21.33	0.35
		5.62	0.68											7.41	0.5
		12.79	3.77											5.62	0.31
		15.22	1.93											12.79	0.32
		15.22	2.46											15.22	0.32
		17.5	1.38											15.22	0.31
		12.14	1.5											17.5	0.23
		14.29	3.08											12.14	0.21
		40.04	2.89											16.05	0.27
		19.6	4.54											14.29	0.14
		29.38	4.61											62.82	0.1
		31.95	3.82											40.04	0.01
		25.78	2.24											19.6	0.1
		19.62	1.39											34.33	0.1
		16.63	3.76											29.38	0.1
		26.1	2.67											31.95	0.01
		24.1	2.42											25.78	0.08
		25.08	2.09											27.88	0.1
		16.14	2.18											19.62	0.05
		43.37	4.64											16.63	0.1
		15.7	0.6											26.1	0.18
		24.39	4.2											24.1	0.1
		26.1	2.06											25.08	0.18
		24.39	0.41											16.14	0.1
		24.1	2.87											43.37	0.1
		24.22	3.17											15.7	0.07
		23.3	2.9											24.39	0.05
		16.14	1.09											26.81	0.3
		23.59	4.9											26.1	0.03
		17.25	1.84											24.39	1.52
		13.13	0.39											24.1	0.05
		14.15	2.29											24.22	0.09
		5.53	1.51											23.3	0.1
		5.31	1.41											16.14	0.1
		7	0.11											23.59	0.21
		6.25	1.6											19.43	0.46
		7.39	1.48											16.37	0.54
		8.58	0.67											13.13	0.76
		4.49	1.11											14.15	0.44
		3.18	0.53											5.53	1.05
		8.58	0.62											5.31	0.65
		4.83	0.23											7	0.4
		9.25	0.55											6.25	0.48
														7.39	0.43
														8.58	0.7
														4.49	1.15
														3.18	0.86
														8.58	0.55
														4.83	1.57
														9.25	0.77
														17.25	-0.0001
