# Supplementary material for: Calcium dependence of neurotransmitter release at a high fidelity synapse
Source: eLife. 2021 Oct 6;10:e70408. doi: 10.7554/eLife.70408 (PMC8494478; doi:10.7554/eLife.70408)
Supplement: Figure 3—source data 1. [file elife-70408-fig3-data1.xlsx]

## Sheet: Figure 3
Figure		3D			3E
Measurement		release rate deconv. vs. [Ca]			delay deconv. vs. [Ca]
		[Ca2+]	release rate		[Ca2+]	delay
Unit		μM	ms-1		μM	ms-1
		36.35	5.19		36.35	0.6
		21.72	0.1		21.72	0.04
		32.71	6.23		32.71	0.68
		19.01	7.43		19.01	0.52
		19.56	10.17		19.56	0.38
		4.27	0.15		4.27	1.52
		13.21	2.76		13.21	0.46
		19.56	2.11		19.56	0.51
		14.83	3.44		14.83	0.49
		22.75	8.52		22.75	0.38
		17.6	10.03		17.6	0.37
		21.21	5.43		21.21	0.44
		3.34	0.5		3.34	0.98
		7.36	3.4		7.36	0.66
		8.03	0.76		8.03	0.58
		3.31	0.07		3.31	0.95
		2.87	0.14		2.87	1.3
		5.33	0.2		5.33	0.7
		9.17	4.29		9.17	0.57
		5.33	0.31		5.33	2.64
		11.38	0.86		11.38	1.5
		2.7	0.36		2.7	1
		21.21	13.77		21.21	0.29
		31.25	11.22		31.25	0.45
		10	3.46		10	0.55
		6.21	0.16		6.21	1.48
		5.83	0.11		5.83	1.66
		5.38	0.25		5.38	0.62
		4.85	0.07		4.85	5.02
		4.18	0.05		4.18	-0.0034
		5.71	0.1		5.71	1
		3.37	0.42		3.37	4.37
		1.27	0.12		1.27	0.25
		7.11	0.1		7.11	0.44
		2.64	0.1		2.64	0.88
		2.52	0.06		2.52	0.64
		1.5	0.06		1.5	2.11
		3.99	0.1		3.99	2.22
		2.41	0.04		2.41	-0.0002
		2.07	0.04		2.07	1.97
		2.23	0.06		2.23	0.41
		2.41	0.14		2.41	1.13
		3.06	0.09		3.06	1.35
		2.41	0.16		2.41	0.47
		2.41	0.37		2.41	0.98
		5.44	0.18		5.44	1
		6.11	0.3		6.11	2.15
		6.11	0.17		6.11	0.77
		2.82	0.17		2.82	2.01
		2.07	0.37		2.07	1.21
		2.07	0.53		2.07	4.8
		1.09	0.12		1.09	1.95
		1.26	0.05		1.26	2.23
		1.26	0.03		1.26	3.53
		1.92	0.07		1.92	0.88
		2.41	0.05		2.41	0.71
		3.64	0.03		3.64	2.04
		3.64	0.04		3.64	1.03
		1.38	0.1		1.38	0.85
