# Supplementary material for: Calcium dependence of neurotransmitter release at a high fidelity synapse
Source: eLife. 2021 Oct 6;10:e70408. doi: 10.7554/eLife.70408 (PMC8494478; doi:10.7554/eLife.70408)
Supplement: Figure 4—source data 1. [file elife-70408-fig4-data1.xlsx]

## Sheet: Figure 4
Figure		4C			4C			4C			4C			4C			4C			4C
Measurement		(1/tau) 5kHz mono vs. [Ca2+]			(1/tau1) 5kHz bi vs. [Ca2+]			(1/tau) 10kHz mono vs. [Ca2+]			(1/tau1) 10kHz bi vs. [Ca2+]			deconv. OGB5N (1/tau) mono vs. [Ca2+]			deconv. OGB5N (1/tau1) bi vs. [Ca2+]			deconv. Flou5F (1/tau) mono vs. [Ca2+]
		[Ca2+]	release rate		[Ca2+]	release rate		[Ca2+]	release rate		[Ca2+]	release rate		[Ca2+]	release rate		[Ca2+]	release rate		[Ca2+]	release rate
Unit		μM	ms-1		μM	ms-1		μM	ms-1		μM	ms-1		μM	ms-1		μM	ms-1		μM	ms-1
		9.71	0.26		11.08	10.98		27.16	4.01		19.62	4.82		21.72	0.1		36.35	5.19		4.85	0.07
		6.46	0.58		12.79	3.77		34.33	7.09		19.14	41.52		4.27	0.15		32.71	6.23		4.18	0.05
		4.92	0.73		15.22	2.46		31.76	21.83		40.1	6.6		3.31	0.07		19.01	7.43		5.71	0.1
		8.68	0.86		12.14	1.5		40.1	6.99		45.11	5.41		2.87	0.14		19.56	10.17		3.37	0.42
		14.48	2.29		16.05	12.83		23.15	2.17		23.15	4.68		5.33	0.2		13.21	2.76		1.27	0.12
		19.76	1.41		62.82	6.15					27.16	5.09		5.33	0.31		19.56	2.11		7.11	0.1
		11.66	2.61		40.04	2.89					45.11	27.2		2.7	0.36		14.83	3.44		2.64	0.1
		6.6	1.07		19.6	4.54					36.25	14.71		6.21	0.16		22.75	8.52		2.52	0.06
		18.03	2.64		34.33	9.23					37.1	22.02		5.83	0.11		17.6	10.03		1.5	0.06
		7.16	0.55		29.38	4.61					21.33	12.8		5.38	0.25		21.21	5.43		3.99	0.1
		5.98	0.32		27.88	7.22											3.34	0.5		2.41	0.04
		3.88	0.74		19.62	1.39											7.36	3.4		2.07	0.04
		8.68	0.71		16.63	3.76											8.03	0.76		2.23	0.06
		3.22	0.67		26.1	2.67											9.17	4.29		2.41	0.14
		7.41	0.19		24.1	2.42											11.38	0.86		3.06	0.09
		5.62	0.68		25.08	2.09											21.21	13.77		2.41	0.16
		15.22	1.93		16.14	2.18											31.25	11.22		2.41	0.37
		17.5	1.38		43.37	4.64											10	3.46		6.11	0.3
		14.29	3.08		24.39	4.2														6.11	0.17
		31.95	3.82		26.1	2.06														2.82	0.17
		25.78	2.24		24.1	2.87														2.07	0.37
		15.7	0.6		24.22	3.17														2.07	0.53
		26.81	6.92		16.14	1.09														1.09	0.12
		24.39	0.41		23.59	4.9														1.26	0.05
		23.3	2.9		19.43	26.77														1.26	0.03
		16.37	5.33		17.25	1.84														1.92	0.07
		13.13	0.39		7.39	1.48														2.41	0.05
		14.15	2.29		8.58	0.67														3.64	0.03
		5.53	1.51																	3.64	0.04
		5.31	1.41																	1.38	0.06
		7	0.11
		6.25	1.6
		4.49	1.11
		3.18	0.53
		8.58	0.62
		4.83	0.23
		9.25	0.55
Figure		4D			4D			4D			4D			4D			4D			4D
Measurement		X2 ratio 5kHz mono vs. [Ca2+]			X2 ratio 5kHz bi vs. [Ca2+]			X2 ratio 10kHz mono vs. [Ca2+]			X2 ratio 10kHz bi vs. [Ca2+]			X2 ratio deconv. OGB5N mono vs. [Ca2+]			X2 ratio deconv. OGB5N bi vs. [Ca2+]			X2 ratio deconv. Flou5F mono vs. [Ca2+]
		[Ca2+]	X2 mono/ X2 bi		[Ca2+]	X2 mono/ X2 bi		[Ca2+]	X2 mono/ X2 bi		[Ca2+]	X2 mono/ X2 bi		[Ca2+]	X2 mono/ X2 bi		[Ca2+]	X2 mono/ X2 bi		[Ca2+]	X2 mono/ X2 bi
		9.71	1.0062		11.08	1.04724		27.16	1.00251		19.62	1.30823		21.72	1.0439		36.35	27.4564		4.85	1
		6.46	1.00578		12.79	1.09045		34.33	1.00089		19.14	1.14637		4.27	0.999958		32.71	37.6123		4.18	1
		4.92	0.997196		15.22	1.26364		31.76	0.999845		40.1	1.24961		8.03	1.07347		19.01	15.3165		5.71	1.01
		8.68	1.00125		12.14	1.22811		40.1	1.00447		45.11	1.31749		3.31	1.03161		19.56	31.3267		3.37	1
		14.48	0.999239		16.05	1.26789		23.15	1.03324		23.15	1.19146		2.87	1.01857		13.21	7.98005		1.27	1
		19.76	1.01554		62.82	4.54383					27.16	1.13805		5.33	1.20728		19.56	3.33057		7.11	1
		11.66	0.999552		40.04	1.1216					45.11	1.06162		5.33	0.999913		14.83	23.0393		2.64	1
		6.6	0.978566		19.6	1.54923					36.25	1.18409		2.7	0.99967		22.75	12.179		2.52	1.36
		18.03	0.999207		34.33	1.51455					37.1	1.47738		6.21	0.99965		17.6	77.8879		1.5	1
		7.16	1.00009		29.38	1.20566					21.33	1.07292		5.83	1.00036		21.21	14.165		3.99	1
		5.98	1.00813		27.88	2.6234								5.38	0.999622		3.34	1.16918		2.41	1
		3.88	1.00329		19.62	1.14057											7.36	8.02313		2.07	1
		8.68	0.999405		16.63	1.17957											9.17	24.0317		2.23	1
		3.22	0.999823		26.1	1.35286											11.38	1.33436		2.41	1
		7.41	1.00072		24.1	2.15168											21.21	29.9507		3.06	1
		5.62	1.00073		25.08	1.48567											31.25	34.1031		2.41	1
		15.22	0.998846		16.14	1.15769											10	25.4904		2.41	1
		17.5	1.03416		43.37	1.41835														5.44	1
		14.29	0.999968		24.39	1.96812														6.11	1
		31.95	1.03269		26.1	1.10329														6.11	1
		25.78	0.999991		24.1	1.30229														2.82	1
		15.7	1.02629		24.22	4.24714														2.07	1
		26.81	0.890555		16.14	1.05208														2.07	1
		24.39	1.00788		23.59	2.49372														1.09	1
		23.3	1.00006		19.43	1.39292														1.26	1
		16.37	1.00652		17.25	1.04047														1.26	1
		13.13	1.03716		7.39	1.07624														1.92	1
		14.15	0.999996		8.58	1.11133														2.41	1
		5.53	1.01799																	3.64	1
		5.31	1.0021																	3.64	1
		7	0.99985																	1.38	1
		6.25	1.02735
		4.49	1.0063
		3.18	1.00204
		8.58	0.999866
		4.83	0.998486
		9.25	1.0039
