# Supplementary material for: Calcium dependence of neurotransmitter release at a high fidelity synapse
Source: eLife. 2021 Oct 6;10:e70408. doi: 10.7554/eLife.70408 (PMC8494478; doi:10.7554/eLife.70408)
Supplement: Figure 5—source data 1. [file elife-70408-fig5-data1.xlsx]

## Sheet: Figure 5
Figure		5B			5C
Measurement		sustained release Cm vs. [Ca2+]			sustained release deconv. vs. [Ca2+]
		[Ca2+]	slope between 10 and 100 ms		[Ca2+]	slope between 10 and 100 ms
Unit		μM	vesicle.ms-1		μM	vesicle.ms-1
		9.71	116.23		36.35	53.98
		6.46	35.23		21.72	179.92
		4.92	73.86		32.71	1334.67
		8.68	19.3		19.01	724.89
		14.48	12.02		19.56	729.44
		11.08	189.51		4.27	164.44
		19.76	37.89		13.21	164.68
		11.66	257.07		19.56	118.54
		6.6	174.34		14.83	346.51
		18.03	50.24		22.75	499.46
		7.16	33.16		17.6	936.74
		5.98	33.3		21.21	161.2
		3.88	23.57		3.34	82.93
		8.68	40.24		7.36	199.96
		3.22	4.85		8.03	233.09
		7.41	84.12		3.31	453.76
		15.22	182.35		2.87	53.04
		15.22	111.09		5.33	95.87
		17.5	68.86		9.17	296.6
		12.14	106.34		5.33	19.13
		16.05	83.07		11.38	302.34
		14.29	117.73		2.7	19.41
		62.82	175.22		21.21	180.04
		40.04	36.24		31.25	244.32
		19.6	155.1		10	318.11
		34.33	237.07		6.21	131.41
		29.38	98.89		5.83	91.13
		31.95	1		4.85	8.89
		25.78	81.14		4.18	22.22
		27.88	27.31		5.71	399.5
		19.62	155.35		3.37	164.38
		26.1	123.73		1.27	439.53
		24.1	177.35		7.11	27.74
		25.08	182.79		2.64	370.64
		16.14	84.02		2.52	931.76
		43.37	17.12		1.5	43.84
		15.7	606.47		3.99	54.53
		24.39	272.68		2.41	58.18
		26.1	114.34		2.07	95.12
		24.39	82.38		2.23	81.26
		24.1	143.78		2.41	409.76
		24.22	285.5		3.06	318.91
		23.3	27.09		2.41	236.08
		23.59	390.3		2.41	68.58
		17.25	7.3		5.44	91.95
		19.62	180.27		6.11	13.67
		19.14	171.12		6.11	314.61
		27.16	14.99		2.82	73.56
		40.1	145.51		2.07	44.08
		45.11	200.78		1.09	799.77
		31.76	3.21		1.26	191.07
		40.1	15.63		1.26	58.5
		23.15	11.84		1.92	170.53
		23.15	40.28		2.41	211.11
		27.16	102.52		3.64	371.64
		45.11	15.88		3.64	550.93
		36.25	59.3
		37.1	27.98
		21.33	25.69
		13.13	26.8
		5.53	13.04
		5.31	18.86
		7	78.53
		6.25	479.28
		7.39	3.21
		8.58	116.47
		4.49	18.13
		3.18	37.6
		8.58	1.03
		4.83	18.32
		9.25	162
