# Supplementary material for: Calcium dependence of neurotransmitter release at a high fidelity synapse
Source: eLife. 2021 Oct 6;10:e70408. doi: 10.7554/eLife.70408 (PMC8494478; doi:10.7554/eLife.70408)
Supplement: Figure 7—source data 1. [file elife-70408-fig7-data1.xlsx]

## Sheet: Figure 7
Figure		7B			7C			7C			7C			7C
Measurement		post-flash [Ca2+]			peak amplitude			amplitude from exp fit.			delay			release rate
Unit		μM			pA			ves.			ms			ms-1
preflash [Ca2+]		low	high		low	high		low	high		low	high		low	high
		4.85	5.71		3	140		1.25	75.99		3.65	1		0.07	0.1
		4.18	2.52		11	163		3.67	167.19		5.23	0.71		0.05	0.06
		3.37	2.41		60	145		8.96	64.4		4.37	1.13		0.42	0.14
		1.27	3.06		151	100		106.68	64.99		0.25	1.3		0.12	0.09
		7.11	2.41		30	96		14.44	39.74		0.85	0.47		0.1	0.16
		2.64	2.41		120	60		56.95	14.91		0.88	0.98		0.1	0.37
		1.5	6.11		18	54		8.89	32.6		1.54	0.77		0.06	0.17
		3.99	2.82		18	23		7.62	7.44		2.22	2.01		0.1	0.17
		2.41	1.09		20	210		15.59	100.75		3.35	1.95		0.04	0.12
		2.07	1.26		19	55		15	31.59		1.41	2.56		0.04	0.05
		2.23	1.26		20	25		12.41	10.44		1	1.08		0.06	0.03
		5.44	3.64		25	45		13.66	55.82		0.21	2.04		0.18	0.03
		6.11	3.64		10	67		2.26	85.06		2.15	1.6		0.3	0.04
		2.07			22			4.51			1.21			0.37
		2.07			8			1.38			4.8			0.53
		1.92			43			34.8			0.8			0.07
		2.41			23			22.21			1			0.05
		1.38			75			47.89			0.89			0.06
